# Supplementary material for: NINJ1 is activated by cell swelling to regulate plasma membrane permeabilization during regulated necrosis
Source: PubMed Central journal article supplement (PMC10657445; doi:10.1038/s41419-023-06284-z), 2023-11-18

**Fig. 2A**

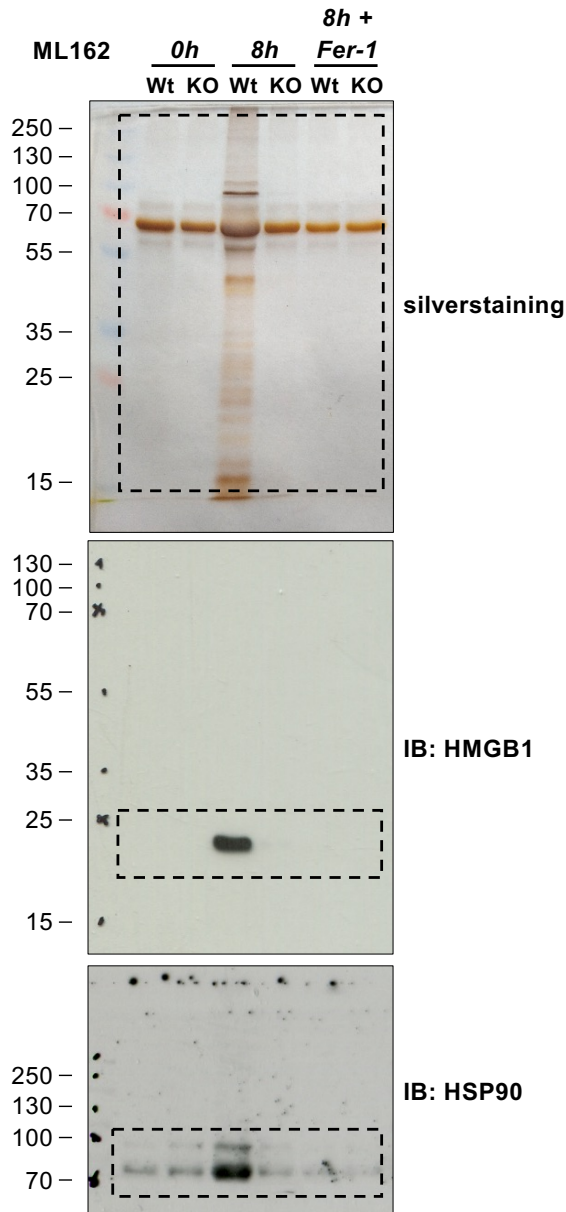

**Fig. 2B**

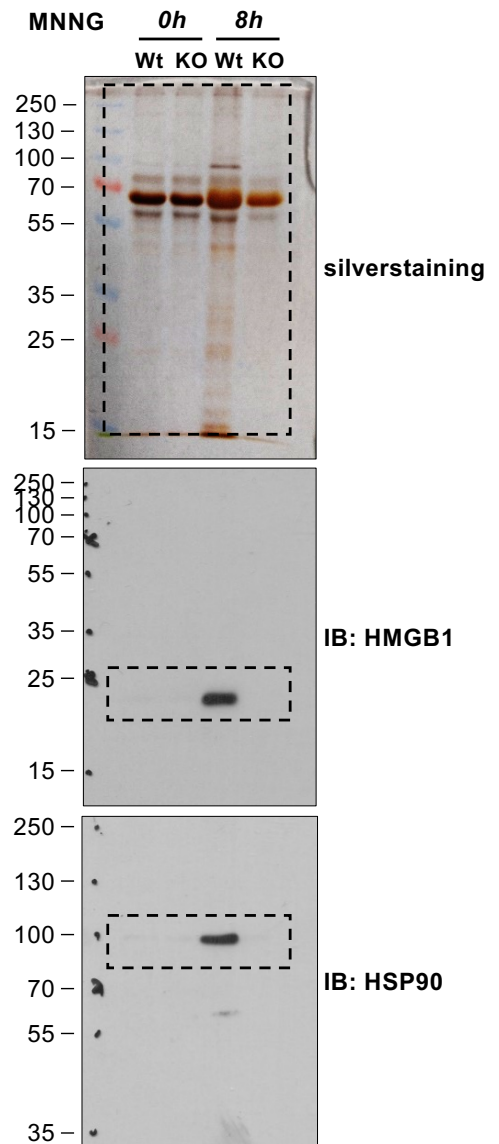

**Fig. 2C**

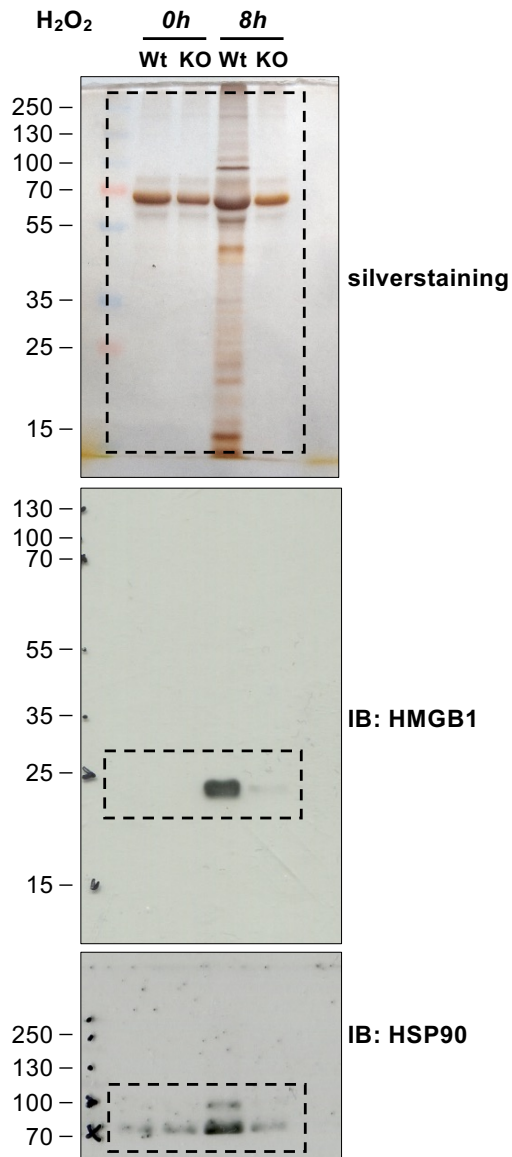

**Fig. 3E**

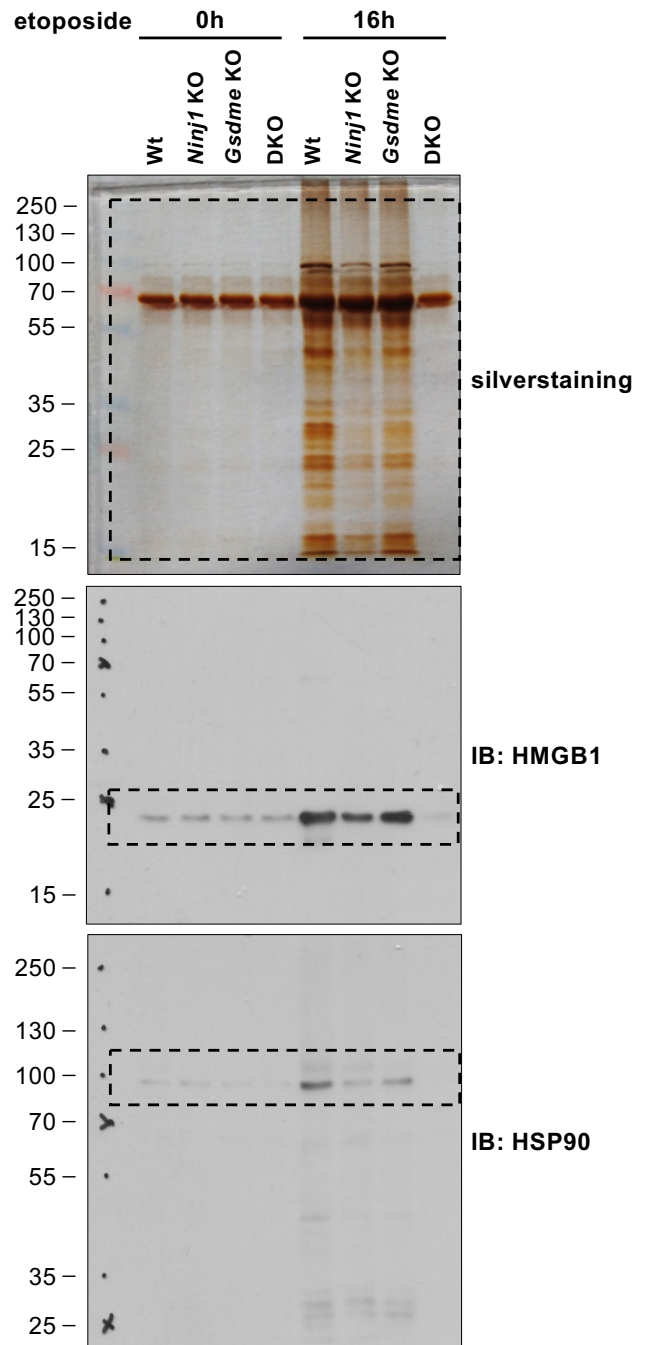

**Fig. 4A**

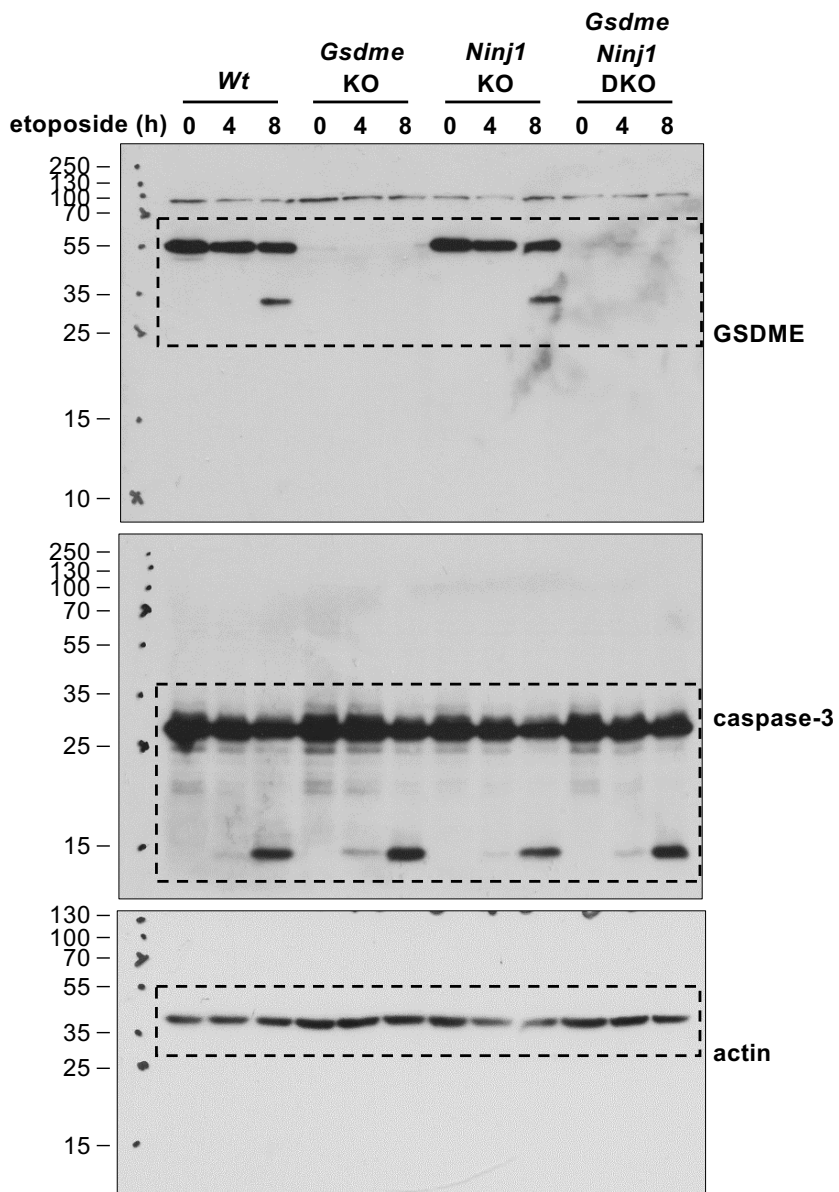

**Fig. 5A**

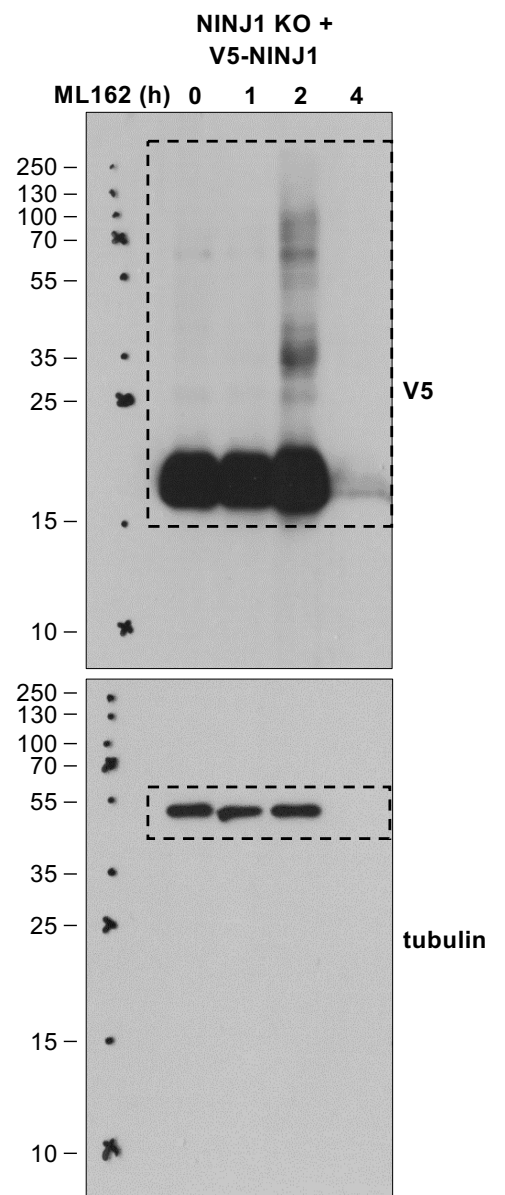

**Fig. 5B**

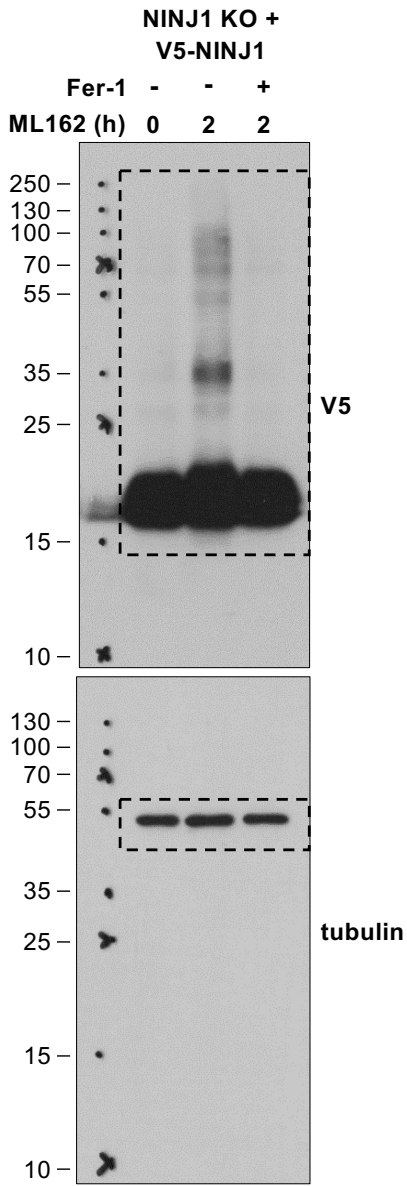

**Fig. 6D**

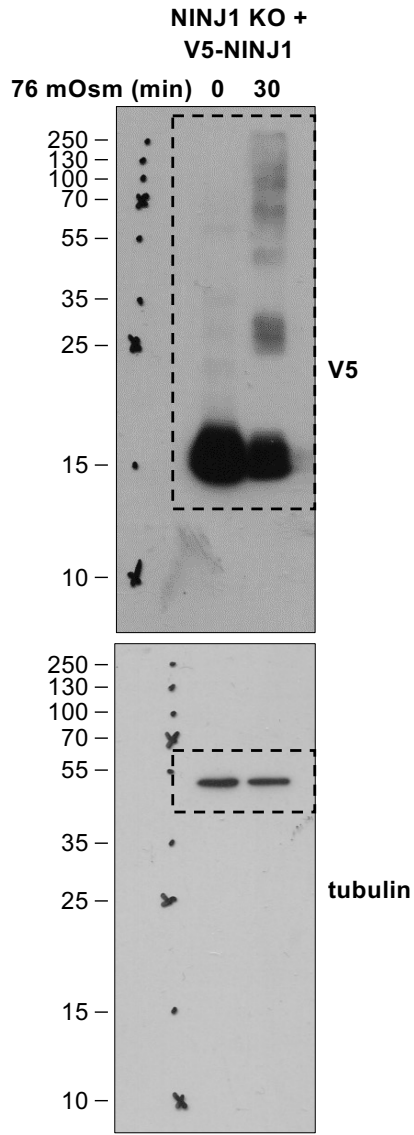

**Fig. 6h**

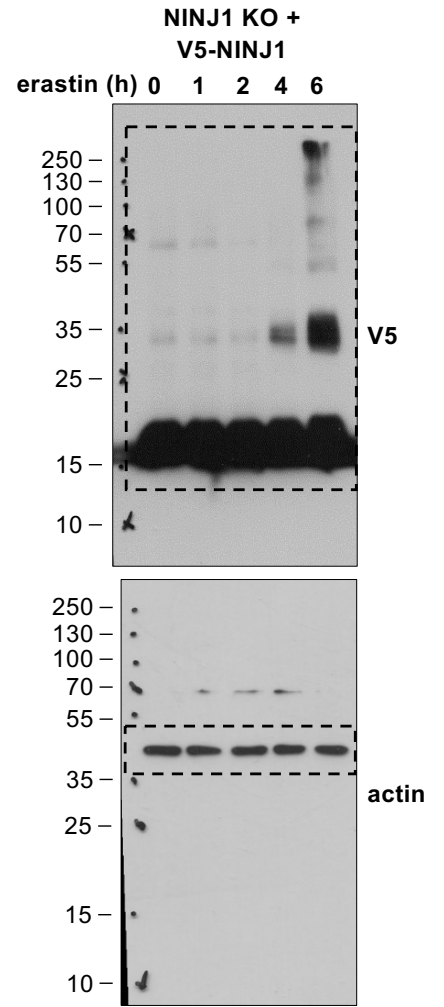

**Fig. 6J**

**SFig. 1D**

**SFig. 3A**

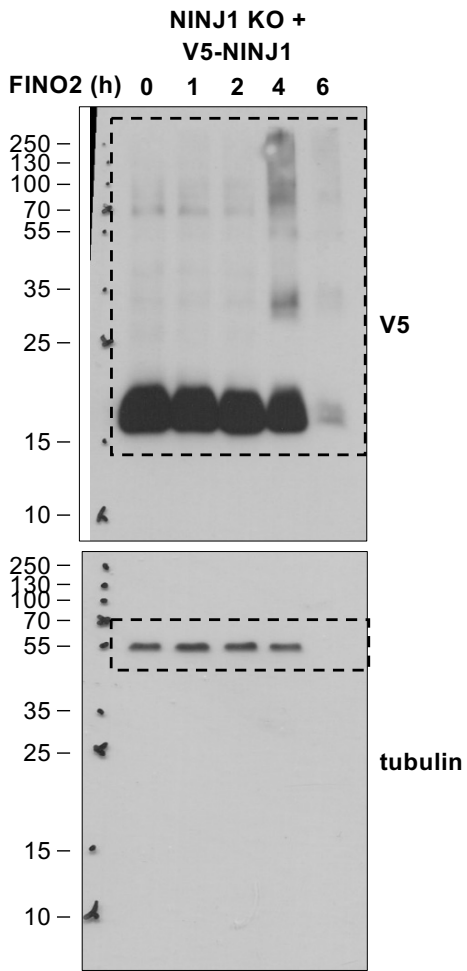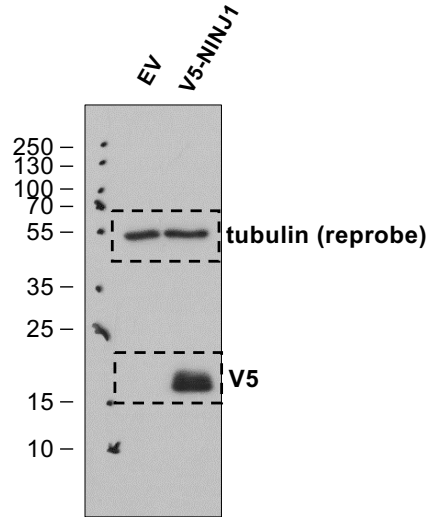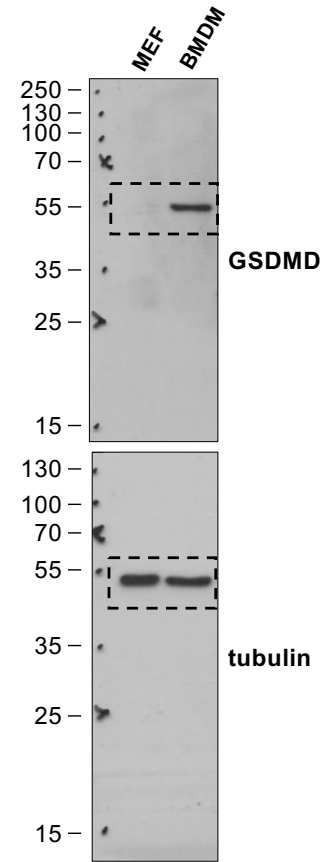

**SFig. 2**

mTNF +  
IKKi + zVAD

|    | 0h | 16h |
|----|----|-----|
| Wt |    |     |
| KO |    |     |
| Wt |    |     |
| KO |    |     |

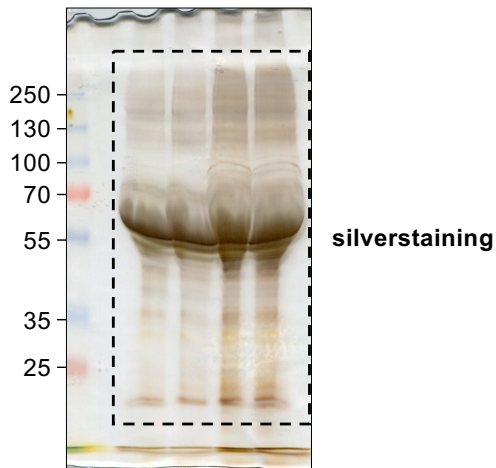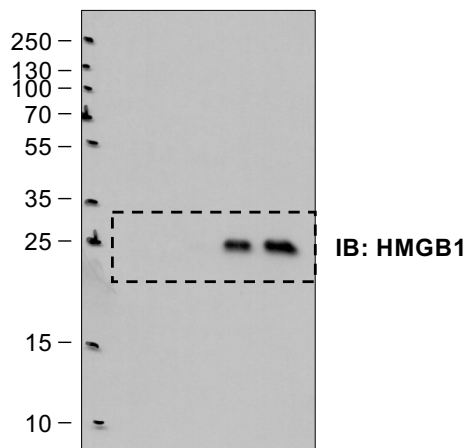

SFig. 3D

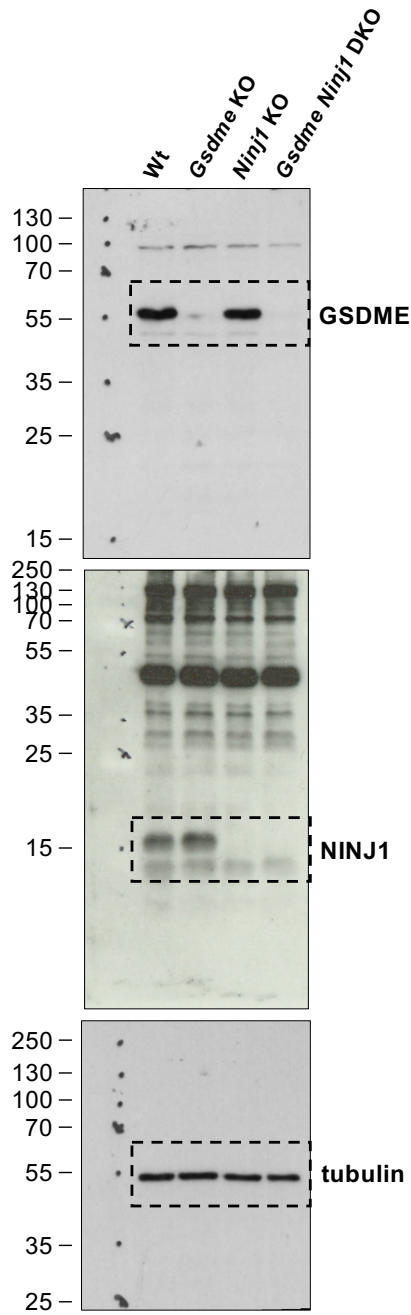

SFig. 3G

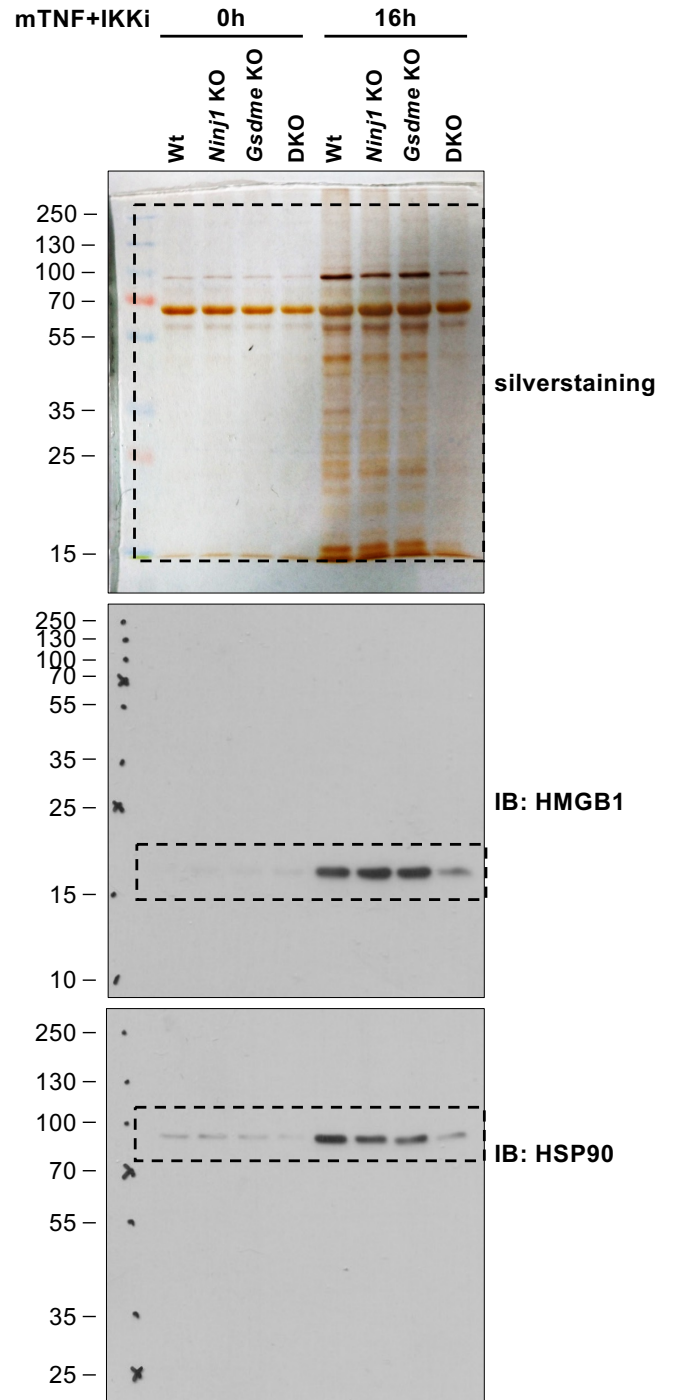

**SFig. 5A**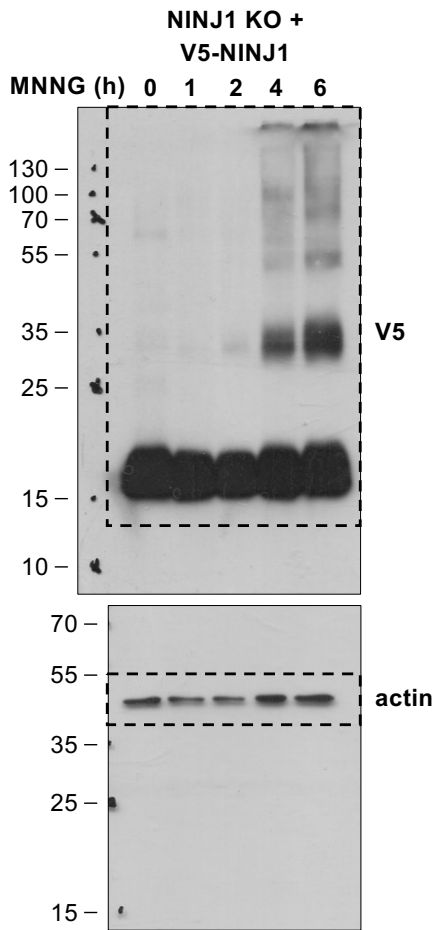**SFig. 5B**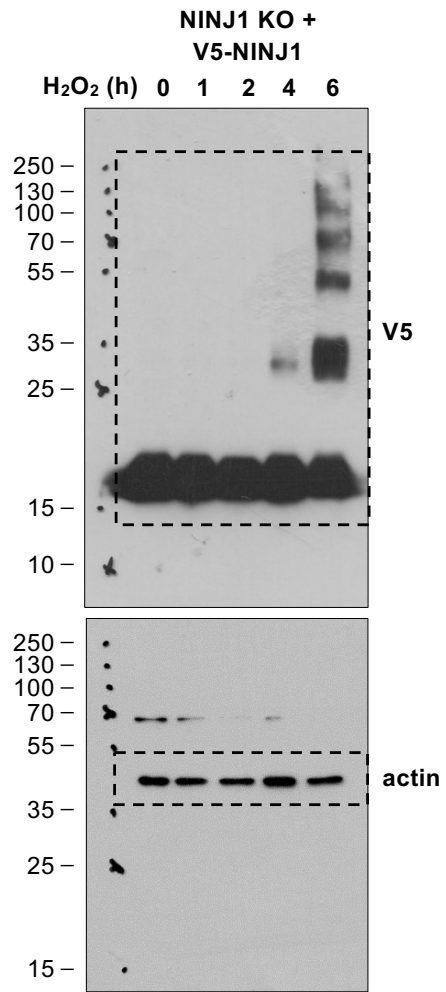**SFig. 5C**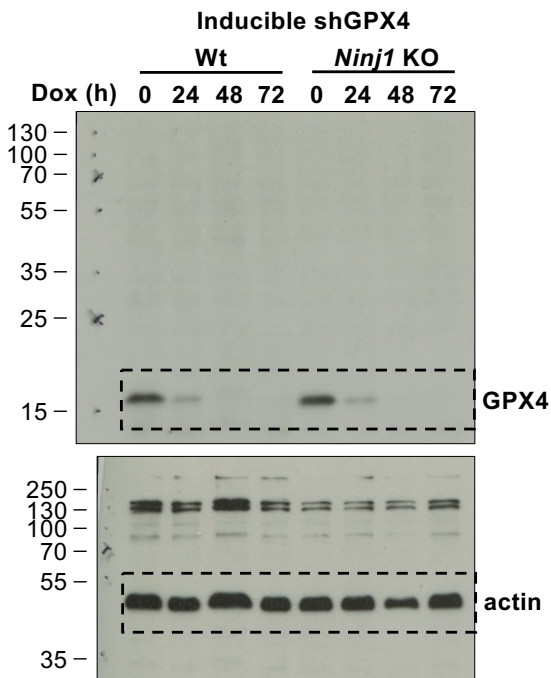**SFig. 6C**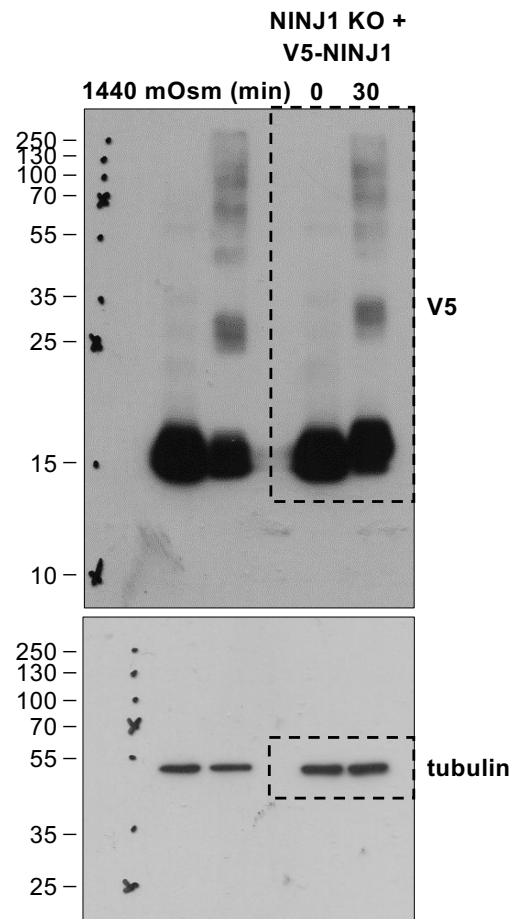

Supplement: 41419_2023_6284_MOESM3_ESM.pdf [file 41419_2023_6284_MOESM3_ESM.pdf]
