# Supplementary material for: NINJ1 is activated by cell swelling to regulate plasma membrane permeabilization during regulated necrosis
Source: PubMed Central journal article supplement (PMC10657445; doi:10.1038/s41419-023-06284-z), 2023-11-18

# SFigure 1

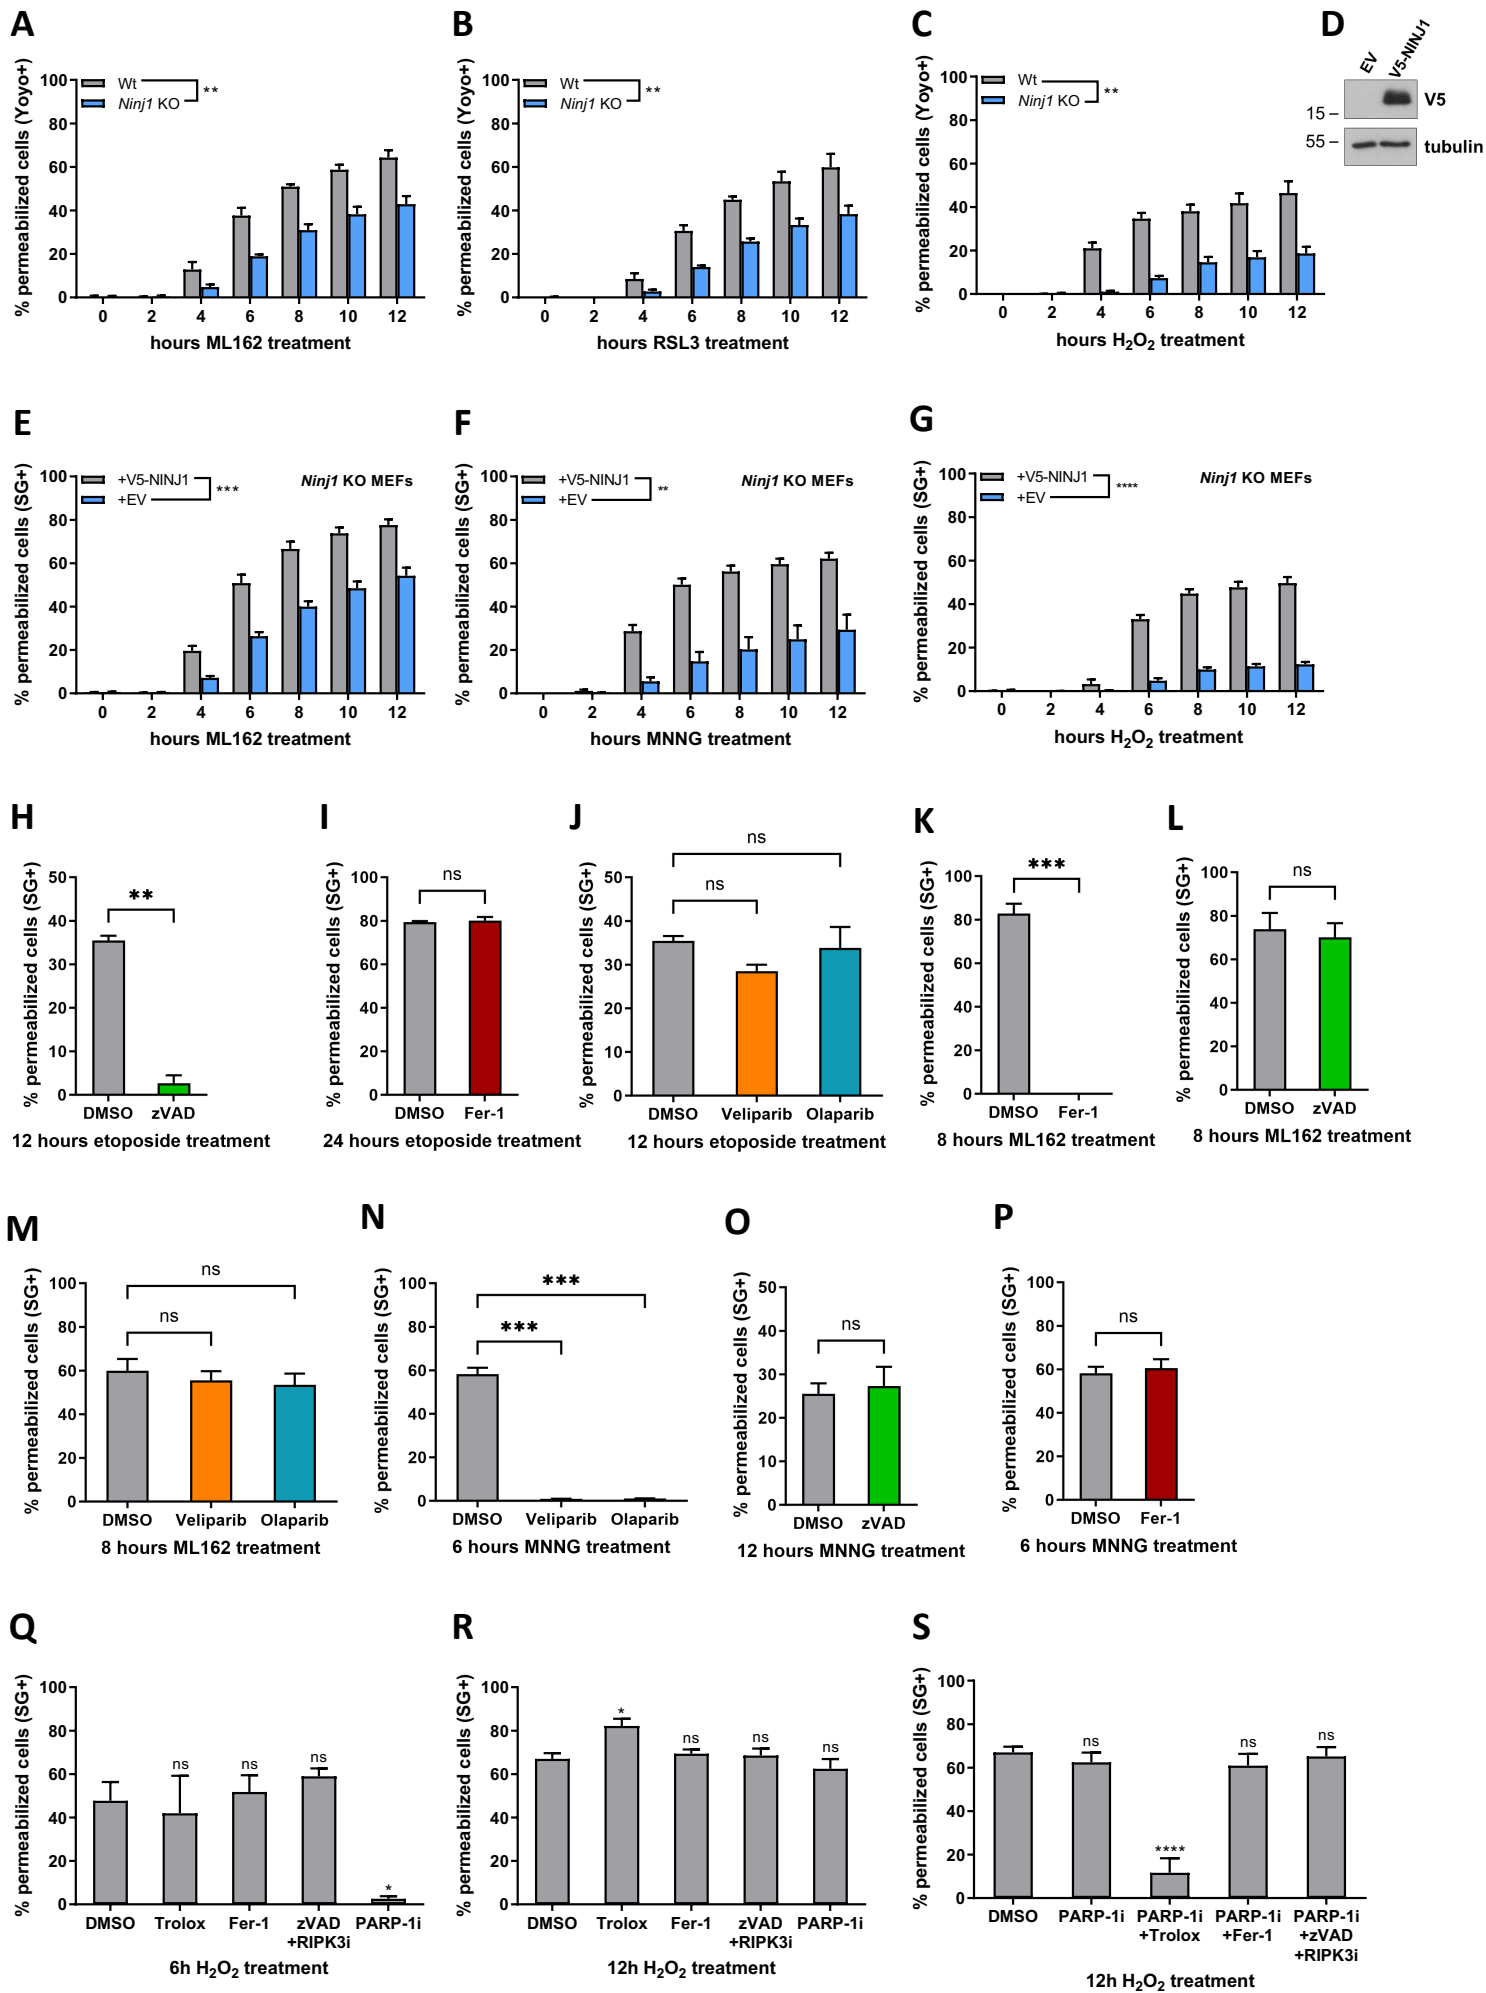

# SFigure 1

**T**

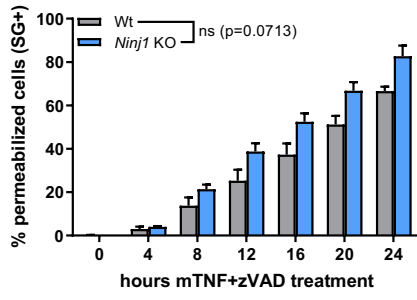

**U**

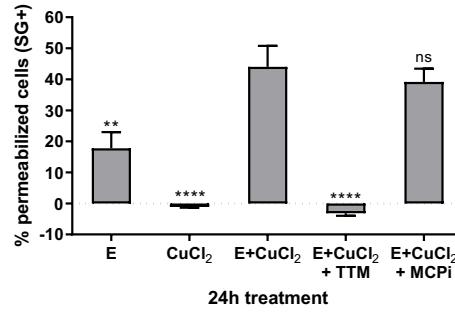

**V**

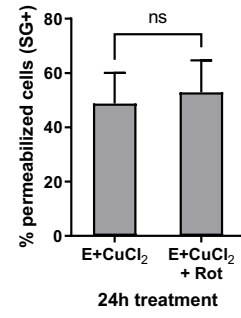

# SFigure 2

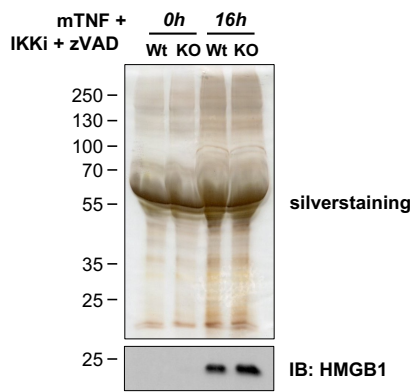

# SFigure 3

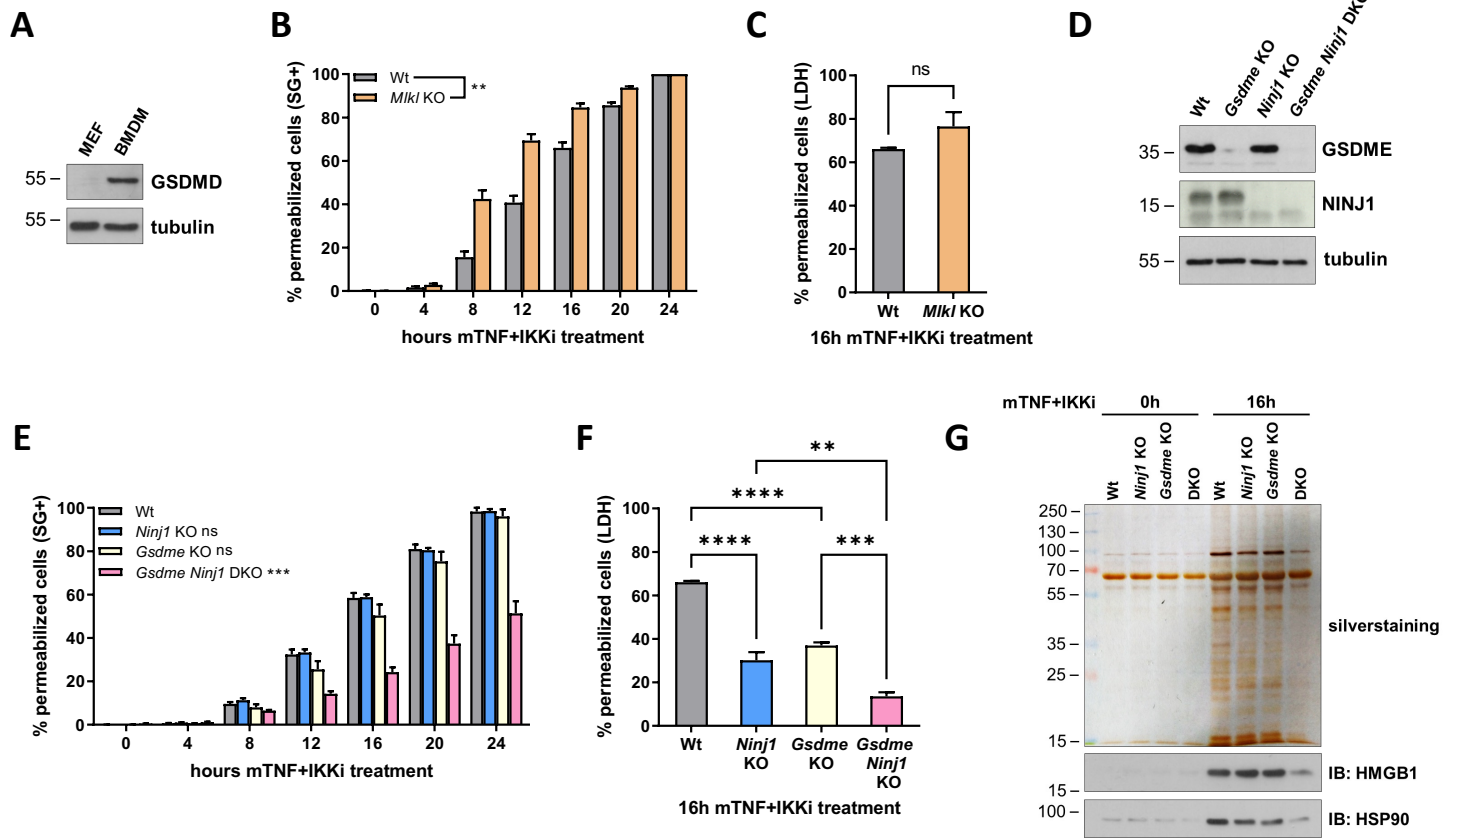

# SFigure 4

A

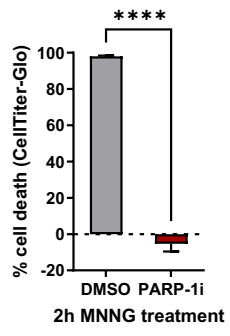

# SFigure 5

**A**

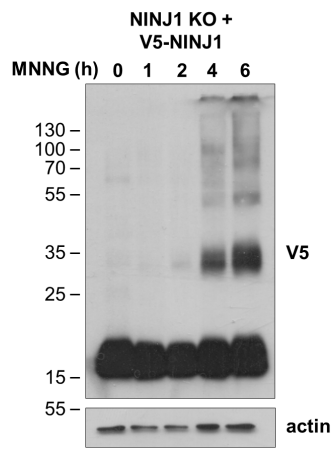

**B**

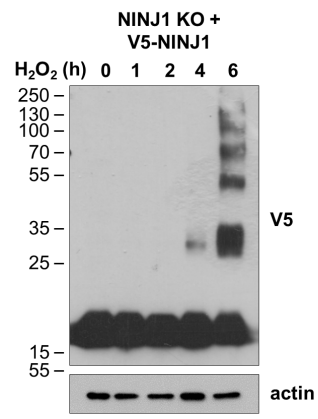

**C**

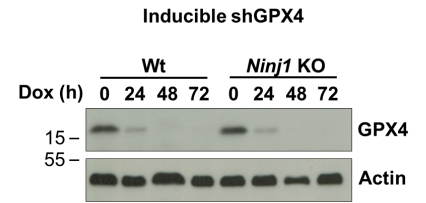

# SFigure 6

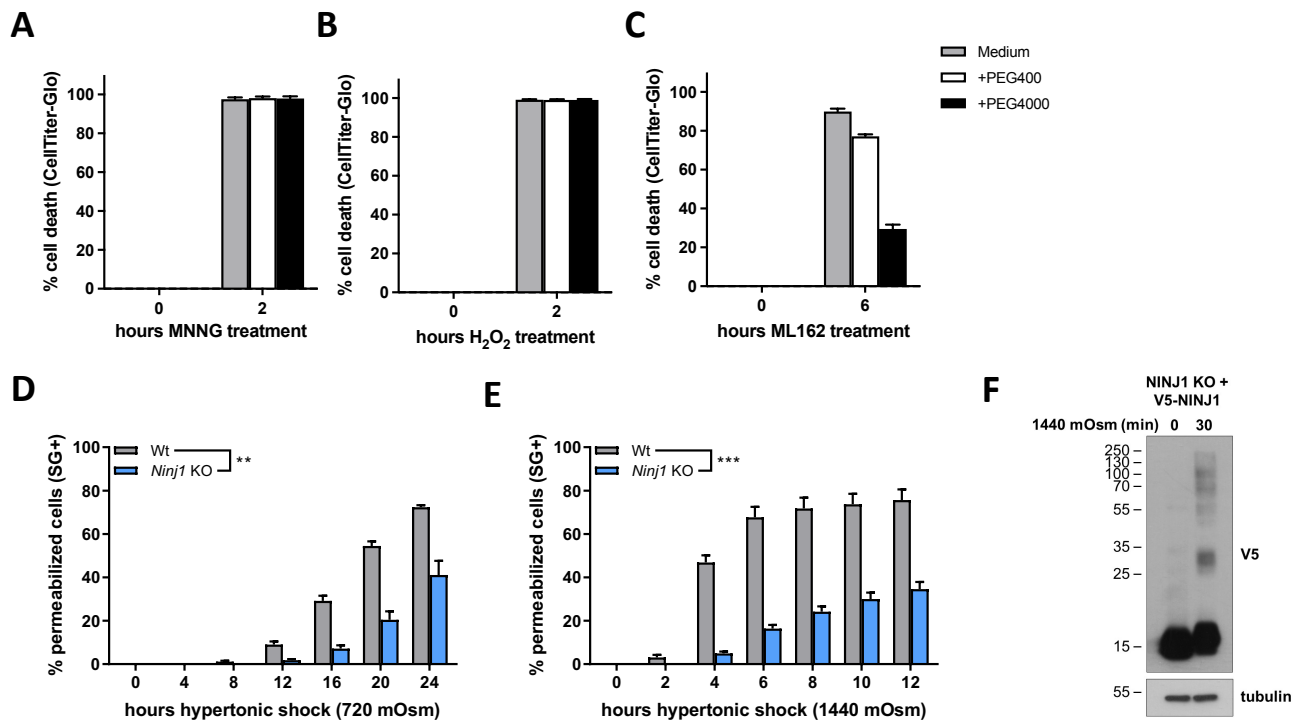

Supplement: 41419_2023_6284_MOESM1_ESM.pdf [file 41419_2023_6284_MOESM1_ESM.pdf]
